# Supplementary material for: The Use of Biopolymers as a Natural Matrix for Incorporation of Essential Oils of Medicinal Plants
Source: MDPI journal article supplement (doi:10.3390/gels8110756), 2022-11-21
Supplement: s1 [file s1]

| Microscope image<br><i>t0</i>                                                                                                                                                                                                                                          | Microscope image<br><i>t1</i>                                                                                                                                                                                                                                                       | Microtopography<br><i>t0</i>                                                                                                                                                                                                                                                                                                             | Microtopography<br><i>t1</i>                                                                                                                                                                                                                                                                                                                        |
|------------------------------------------------------------------------------------------------------------------------------------------------------------------------------------------------------------------------------------------------------------------------|-------------------------------------------------------------------------------------------------------------------------------------------------------------------------------------------------------------------------------------------------------------------------------------|------------------------------------------------------------------------------------------------------------------------------------------------------------------------------------------------------------------------------------------------------------------------------------------------------------------------------------------|-----------------------------------------------------------------------------------------------------------------------------------------------------------------------------------------------------------------------------------------------------------------------------------------------------------------------------------------------------|
| Sample 1 (7.5% lemon EO)                                                                                                                                                                                                                                               |                                                                                                                                                                                                                                                                                     |                                                                                                                                                                                                                                                                                                                                          |                                                                                                                                                                                                                                                                                                                                                     |
| 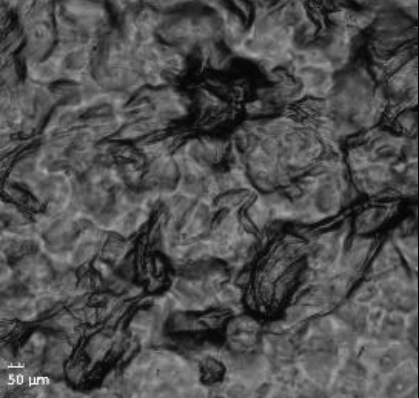 Microscope image of Sample 1 at <i>t0</i> . The surface shows a rough, granular texture with some darker, irregular patches. A scale bar in the bottom left corner indicates 50 μm.  |  Microscope image of Sample 1 at <i>t1</i> . The surface texture is similar to <i>t0</i> , but the darker patches appear more pronounced. A scale bar in the bottom left corner indicates 50 μm.  |  Microtopography map of Sample 1 at <i>t0</i> . The color scale ranges from blue (low) to yellow (high). The surface shows a complex, irregular topography with many small peaks and valleys. A scale bar in the bottom left corner indicates 50 μm.  |  Microtopography map of Sample 1 at <i>t1</i> . The color scale ranges from blue (low) to yellow (high). The surface topography is similar to <i>t0</i> , but the peaks appear slightly more pronounced. A scale bar in the bottom left corner indicates 50 μm.  |
| Sample 2 (15% lemon EO)                                                                                                                                                                                                                                                |                                                                                                                                                                                                                                                                                     |                                                                                                                                                                                                                                                                                                                                          |                                                                                                                                                                                                                                                                                                                                                     |
|  Microscope image of Sample 2 at <i>t0</i> . The surface shows a rough, granular texture with some darker, irregular patches. A scale bar in the bottom left corner indicates 50 μm. |  Microscope image of Sample 2 at <i>t1</i> . The surface texture is similar to <i>t0</i> , but the darker patches appear more pronounced. A scale bar in the bottom left corner indicates 50 μm. |  Microtopography map of Sample 2 at <i>t0</i> . The color scale ranges from blue (low) to yellow (high). The surface shows a complex, irregular topography with many small peaks and valleys. A scale bar in the bottom left corner indicates 50 μm. |  Microtopography map of Sample 2 at <i>t1</i> . The color scale ranges from blue (low) to yellow (high). The surface topography is similar to <i>t0</i> , but the peaks appear slightly more pronounced. A scale bar in the bottom left corner indicates 50 μm. |
| Sample 3 (7.5% grapefruit EO)                                                                                                                                                                                                                                          |                                                                                                                                                                                                                                                                                     |                                                                                                                                                                                                                                                                                                                                          |                                                                                                                                                                                                                                                                                                                                                     |

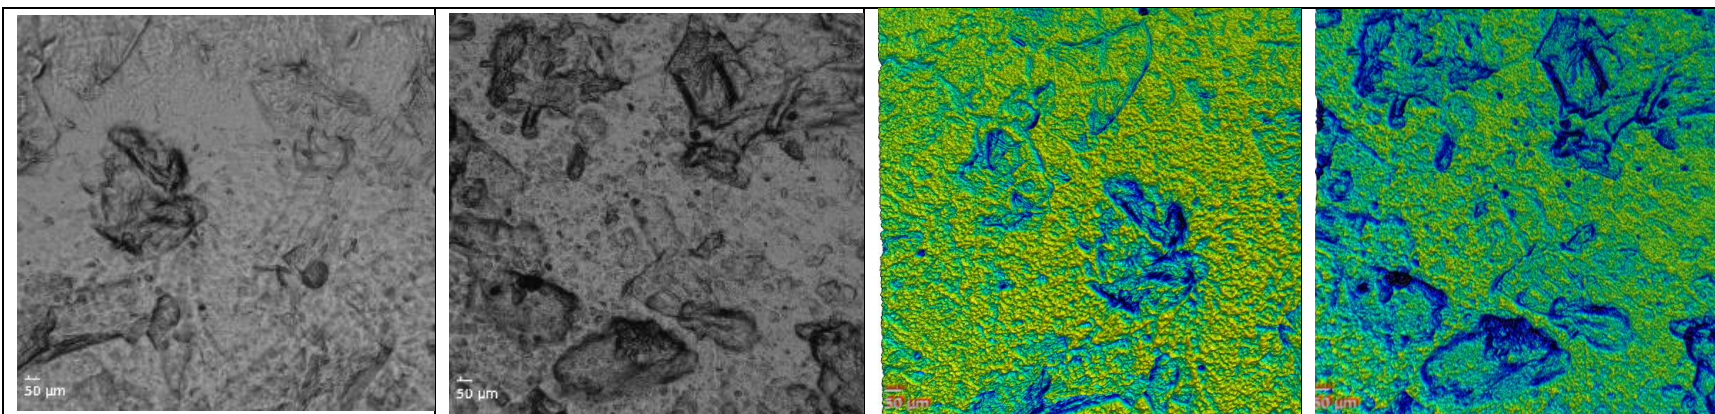

**Sample 4 (15% grapefruit EO)**

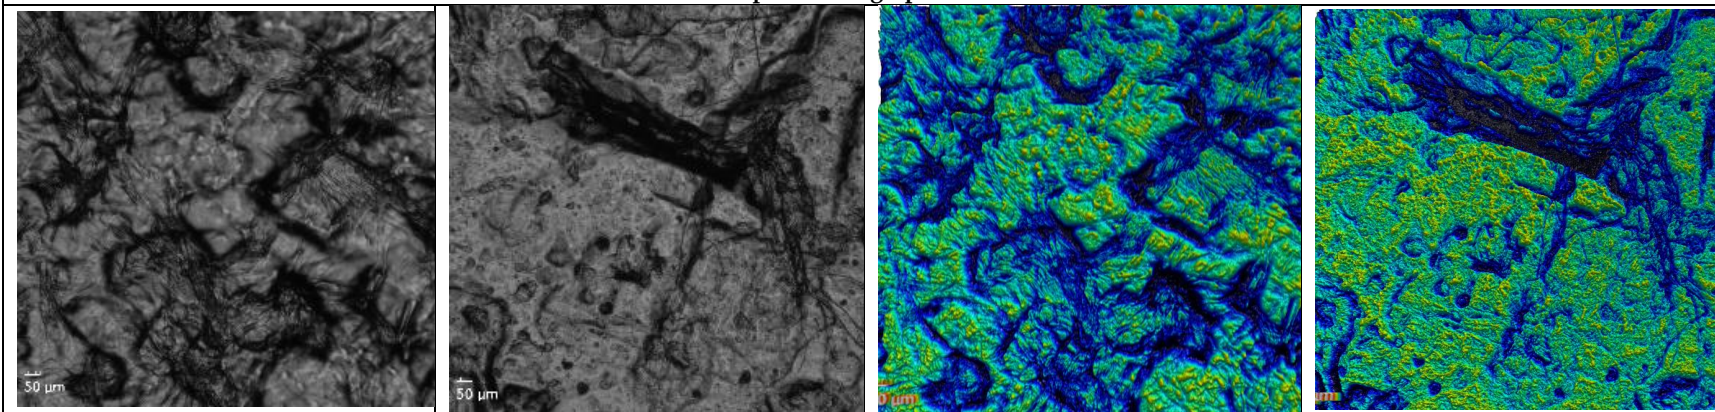

**Sample 5 (7.5% orange EO)**

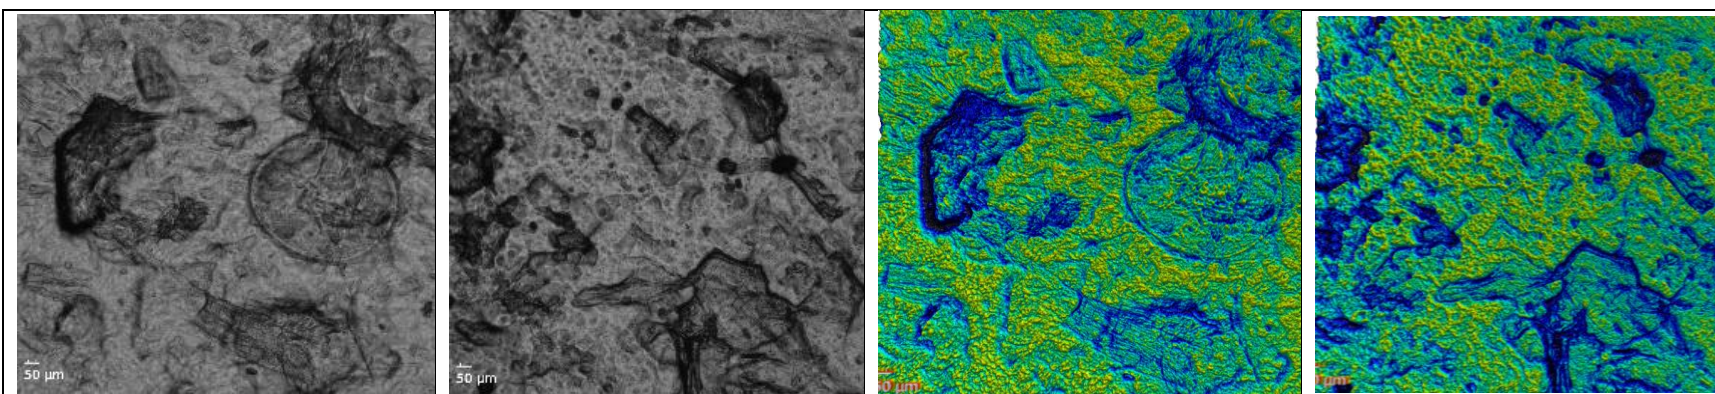

**Sample 6 (15% orange EO)**

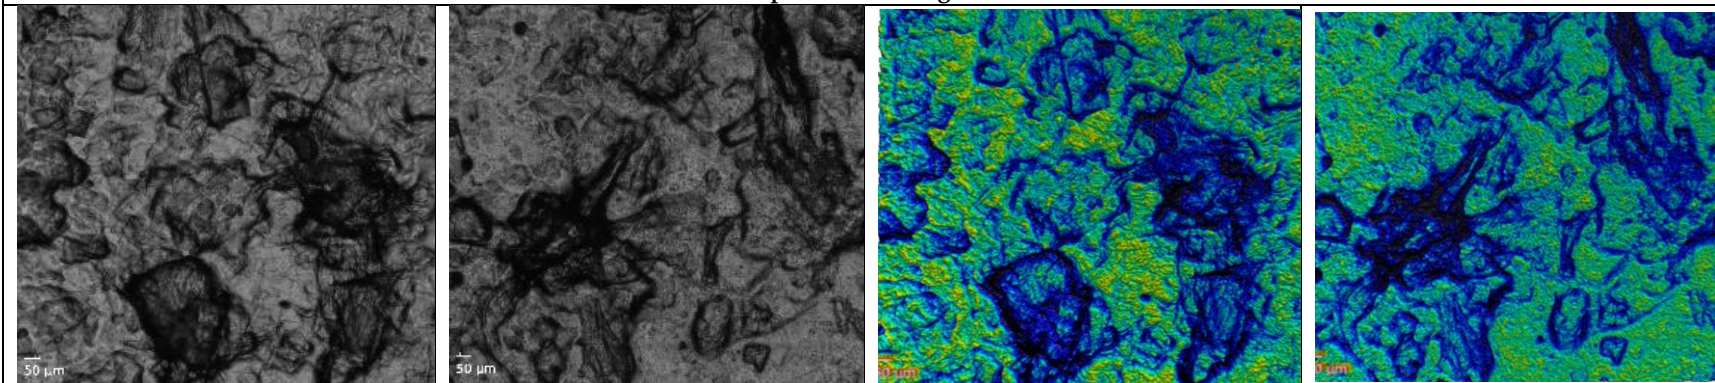

**Sample 7 (7.5% cinnamon EO)**

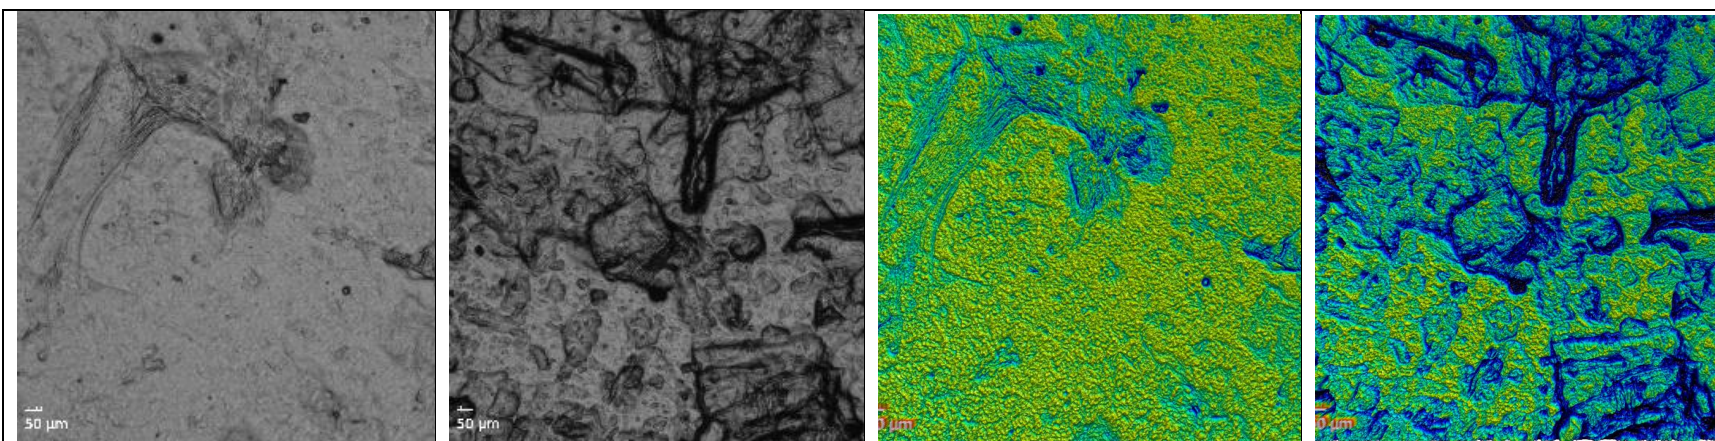

Sample 8 (15% cinnamon EO)

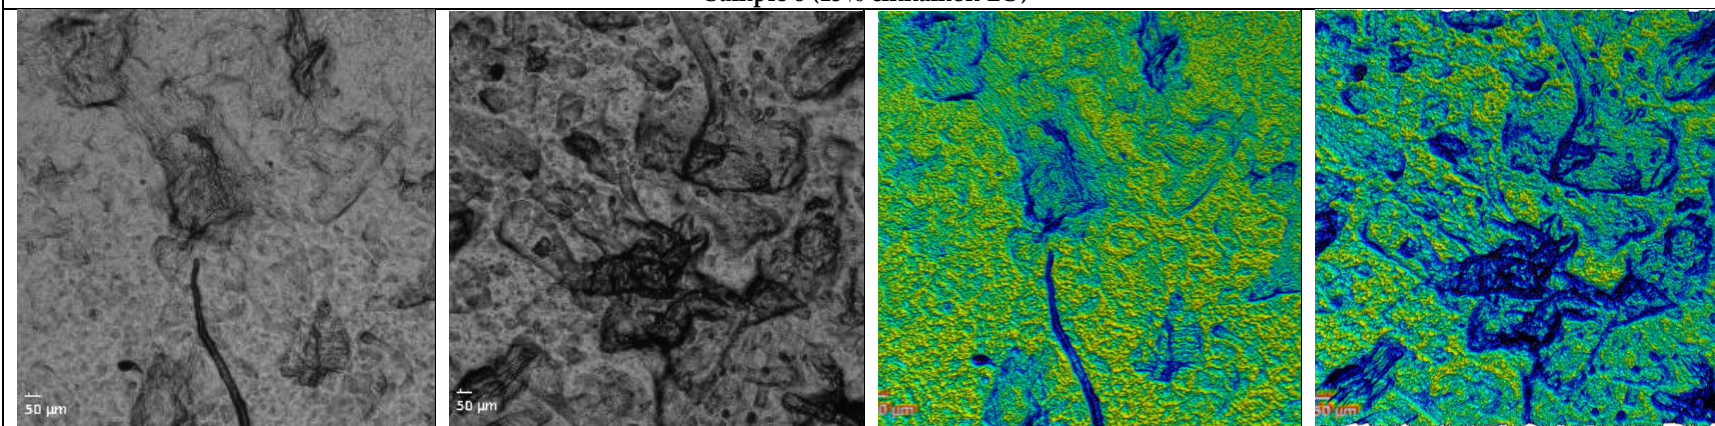

Sample 9 (7.5% clove EO)

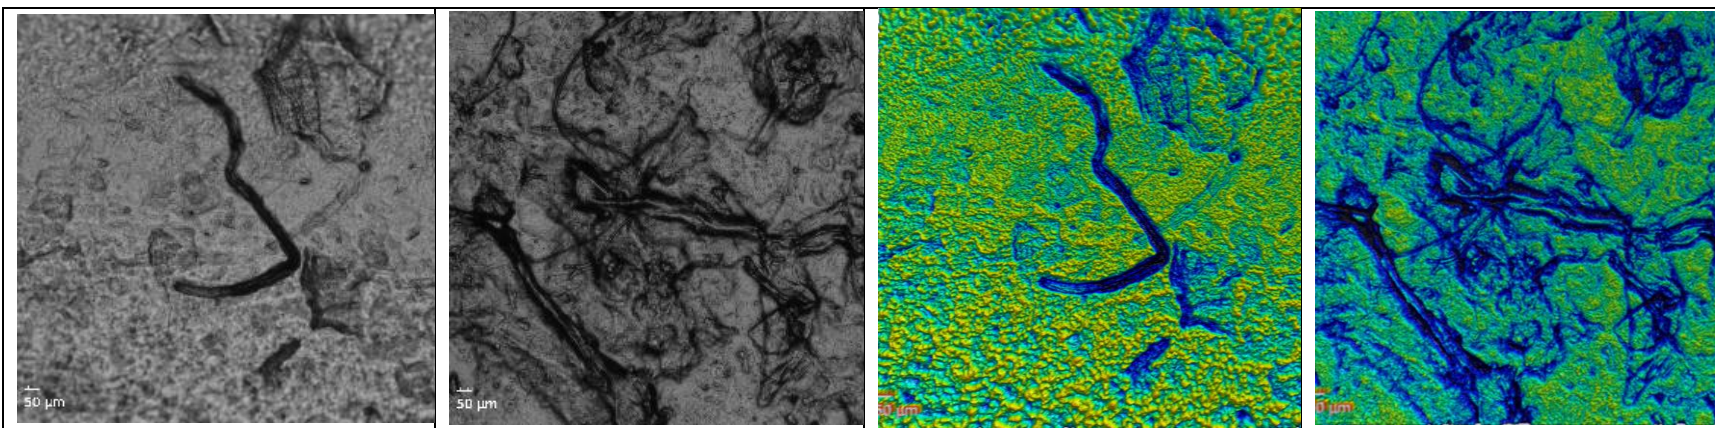

Sample 10 (15% clove EO)

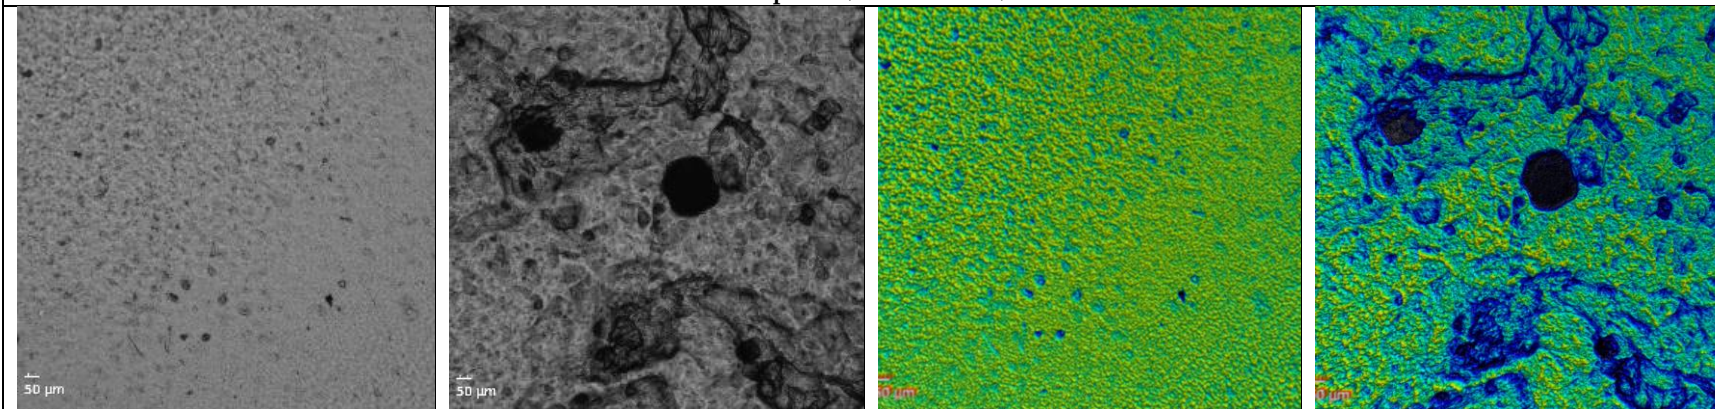

Sample 11 (7.5% mint EO)

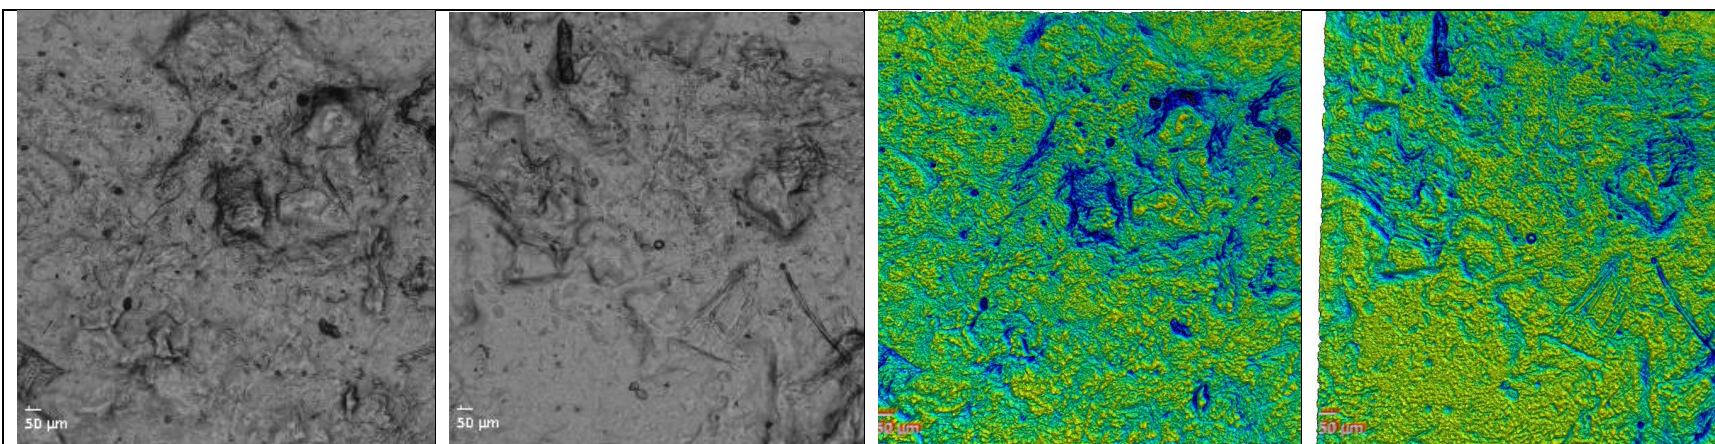

Sample 12 (15% mint EO)

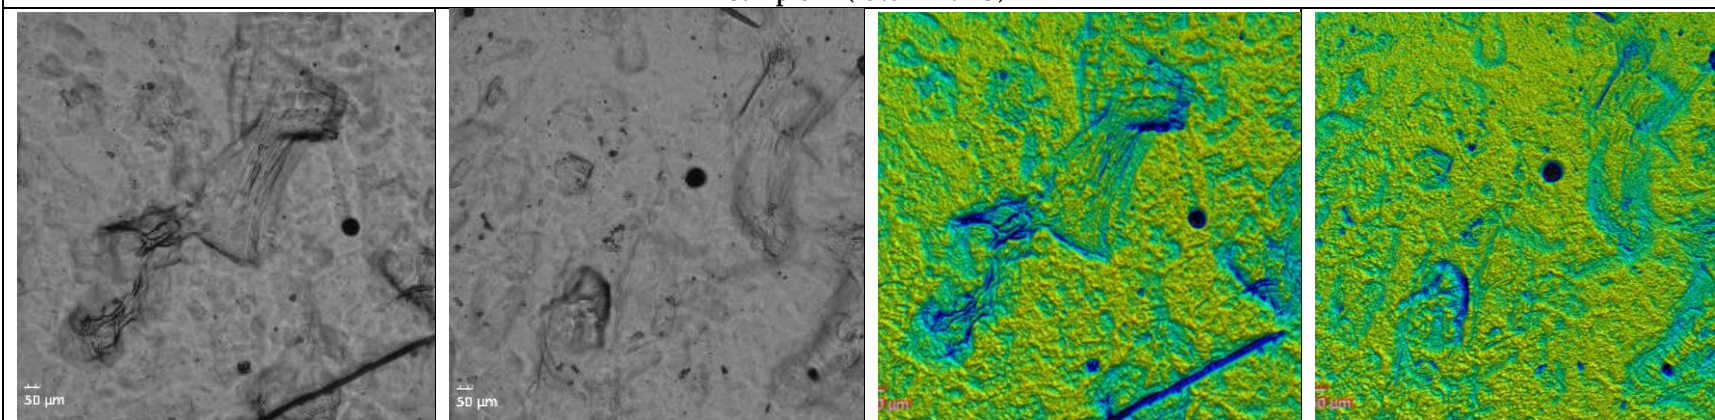

Sample 13 (7.5% ginger EO)

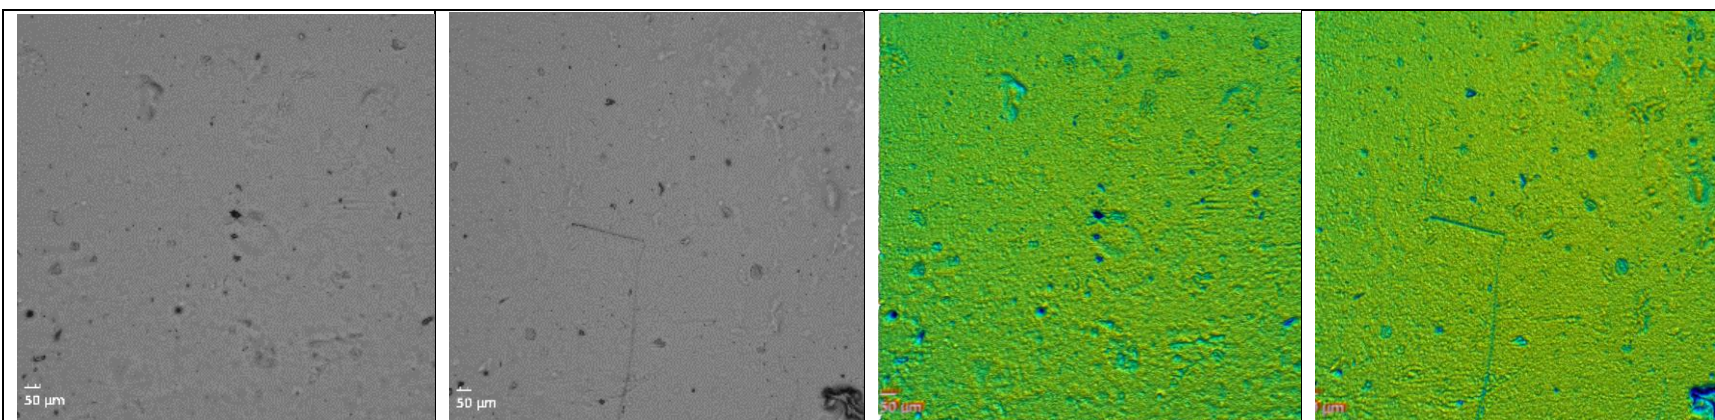

**Sample 14 (15% ginger EO)**

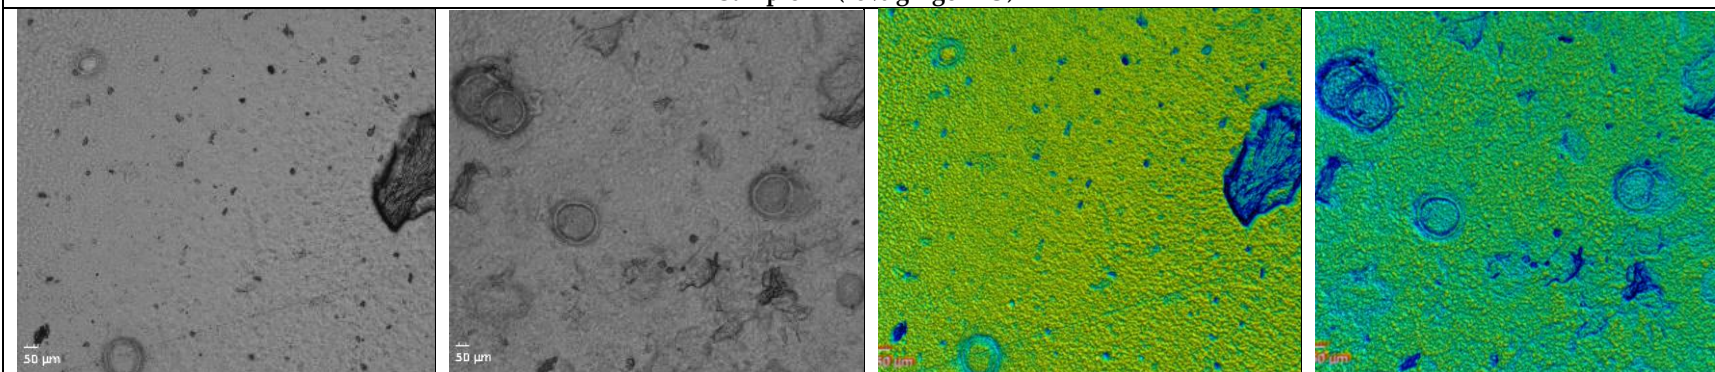

**Sample 15 (7.5% eucalyptus EO)**

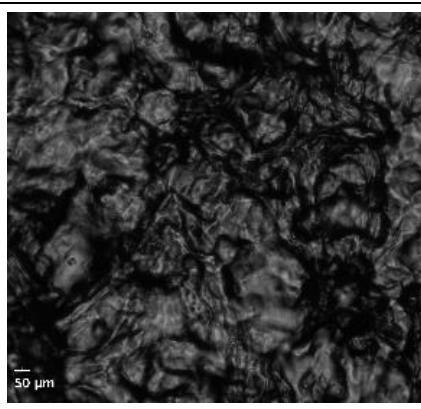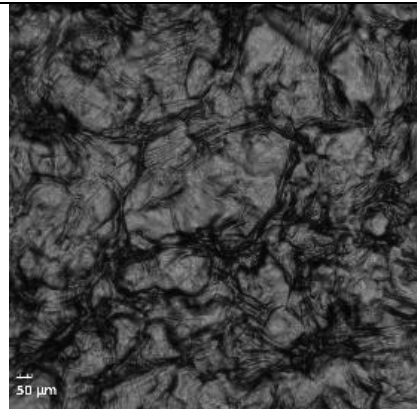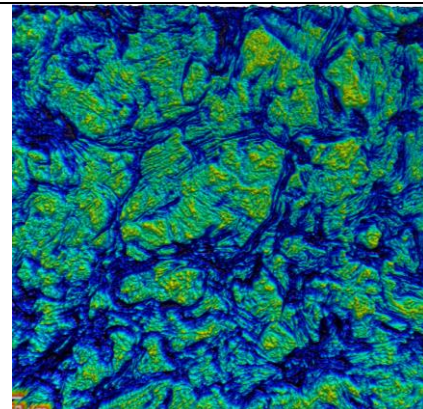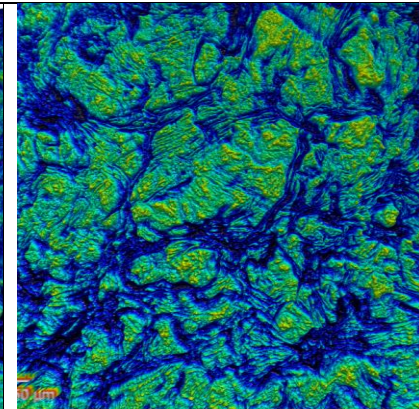

Sample 16 (15% eucalyptus EO)

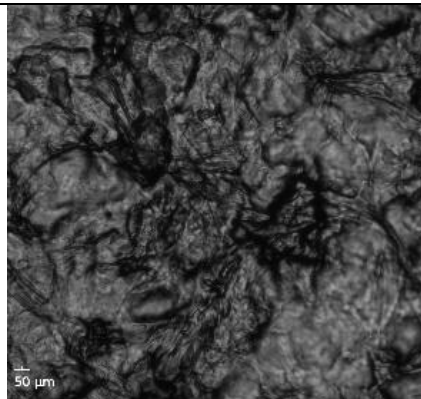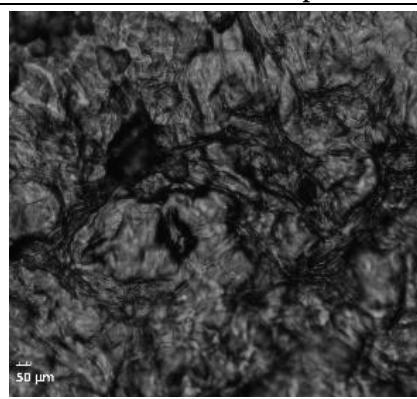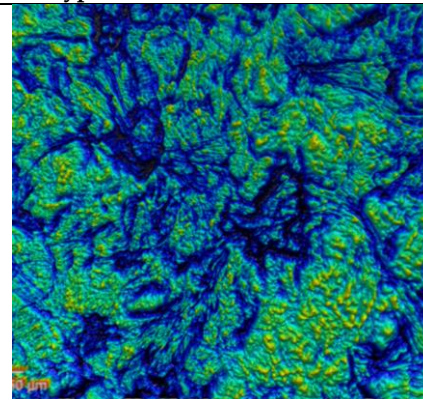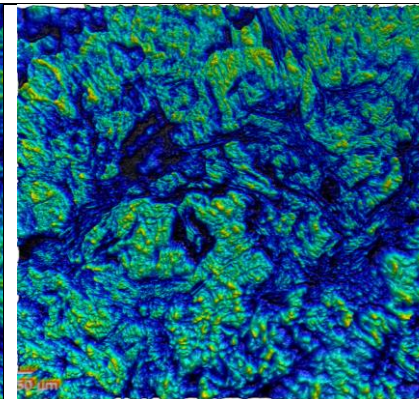

Sample 17 (7.5% chamomile EO)

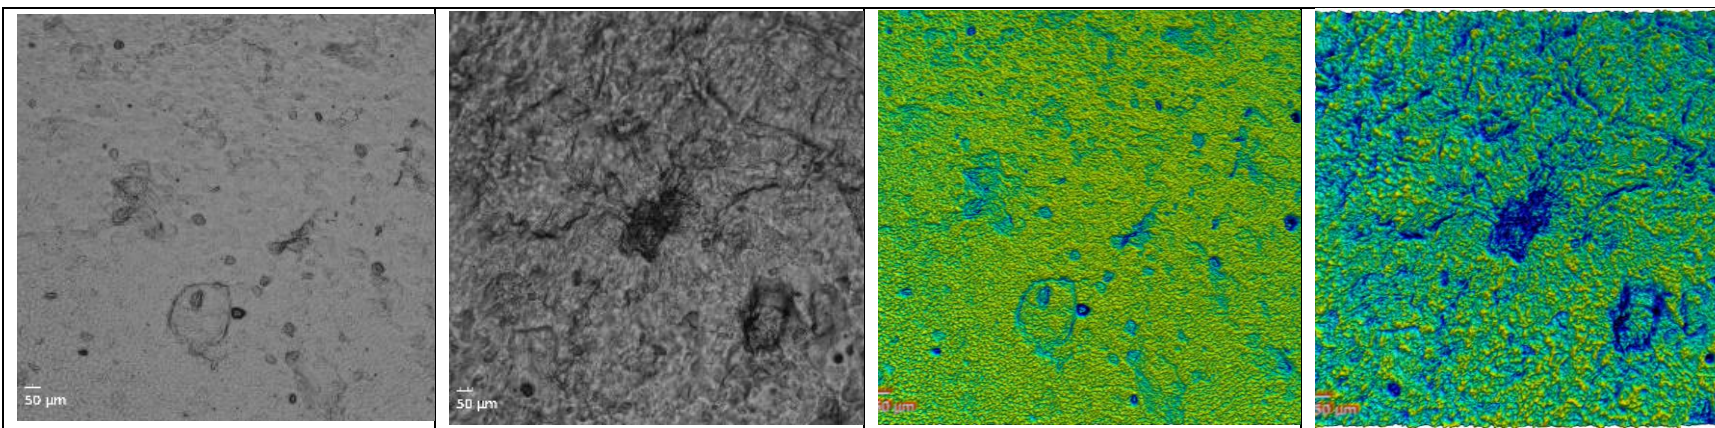

Sample 18 (15% chamomile EO)

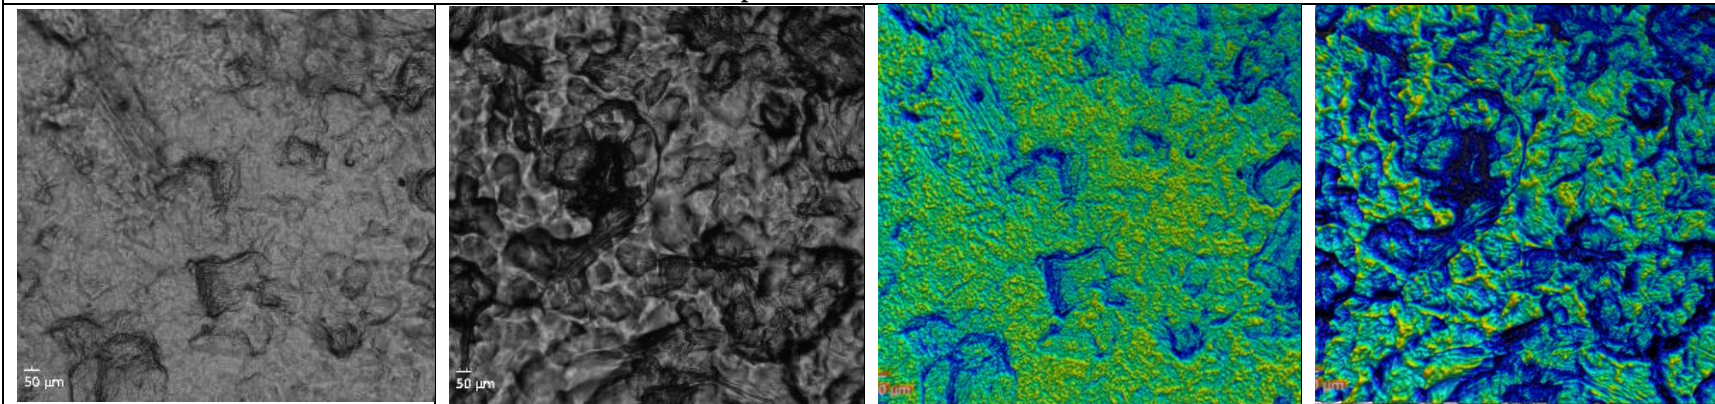

Sample 19 (control, no EO)

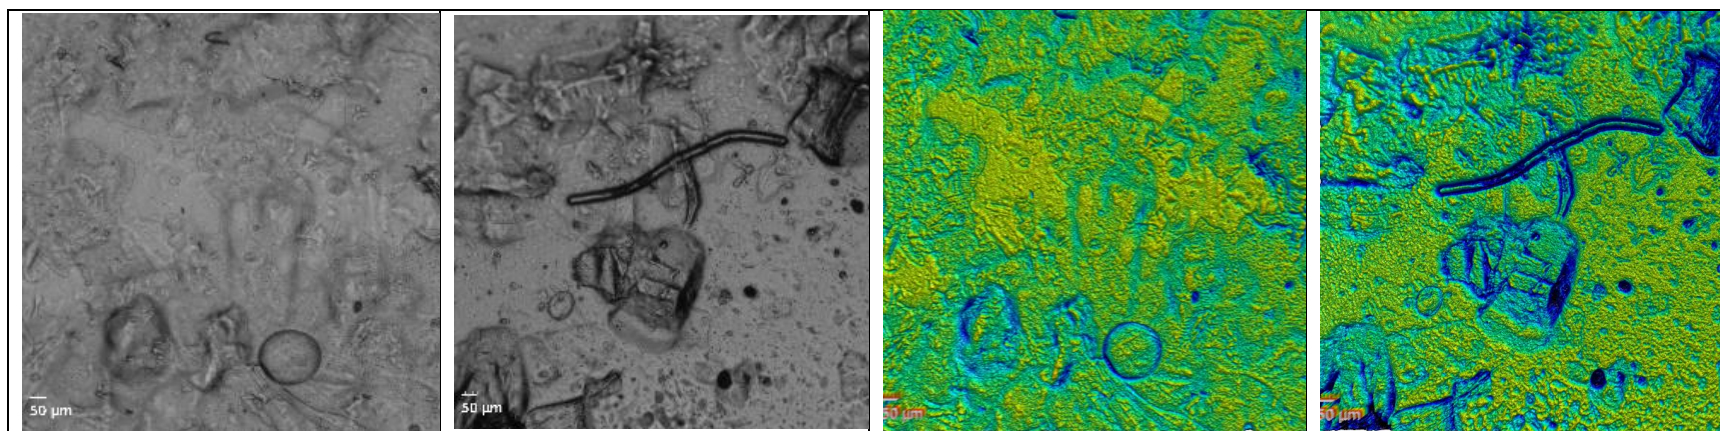

**Figure S1.** Microstructure images of tested films, obtained at initial time ( $t_0$ ) and after one year storage ( $t_1$ ).

**Table S1.** Essential oils' chemical composition, according to the manufacturer data sheet.

| <i>Essential oil</i> | <i>Chemical composition</i>                                                                                                                  |
|----------------------|----------------------------------------------------------------------------------------------------------------------------------------------|
| lemon                | $\beta$ -Pinene, $\gamma$ -Terpinene, D-(+)-Limonene, Citral, Myrcene                                                                        |
| orange               | DL- $\alpha$ -Pinene, Linalool, Citral, Myrcene,                                                                                             |
| grapefruit           | D-(+)-Limonene, Myrcene                                                                                                                      |
| clove                | Eugenol, $\beta$ -Caryophyllene, $\alpha$ -Humulene, Isoeugenol                                                                              |
| cinnamon             | Eugenol, Linalool, DL- $\alpha$ -Pinene, DL-Limonene                                                                                         |
| chamomile            | Camphene                                                                                                                                     |
| mint                 | (-)-Menthol, (-)-Menthone, Eucalyptol, L-limonene, $\beta$ -Pinene, DL- $\alpha$ -Pinene                                                     |
| eucalyptus           | Eucalyptol, D-(+)-Limonene, DL- $\alpha$ -Pinene, (+)- Camphor, Myrcene, $\beta$ -Pinene, Sabinene, $\alpha$ -Terpineol, $\gamma$ -Terpinene |
| ginger               | Geranial, Neral, Camphene, Zingiberene, ar-curcumene, $\beta$ -bisabolene, $\beta$ -sesquiphellandrene                                       |
